# Supplementary material
Source: PubMed Central journal article supplement (PMC4199386)
Supplement: NIHMS628239-supplement-Supplementary_Data.pdf [file NIHMS628239-supplement-Supplementary_Data.pdf]

## Supplemental Information

**SUPPLEMENTAL TABLE 4** Inclusion Criteria by ICD-9-CM<sup>5</sup>

|                                                                                                |                                                                                                                          |
|------------------------------------------------------------------------------------------------|--------------------------------------------------------------------------------------------------------------------------|
| Pneumonia in whooping cough                                                                    | 484.3                                                                                                                    |
| Pneumonia, other types                                                                         | 480.2, 480.8, 480.9, 481, 482.0, 482.1,<br>482.2, 482.82, 482.83, 482.9, 483.0, 483.1,<br>484.3, 485, 486, 487.0, 7770.0 |
| Pneumothorax                                                                                   | 512.0, 512.8                                                                                                             |
| Apnea                                                                                          | 786.03, 770.81                                                                                                           |
| Seizures                                                                                       | 779.0, 780.39, 345.3                                                                                                     |
| Encephalopathy or encephalitis                                                                 | 323.6, 348.30                                                                                                            |
| Acute respiratory failure, other<br>pulmonary insufficiency, respiratory<br>distress, asphyxia | 518.81, 518.82, 786.09, 799.0, 799.1                                                                                     |
| Gastroesophageal reflux                                                                        | 530.81                                                                                                                   |
| Vomiting                                                                                       | 787.0                                                                                                                    |
| Bronchiolitis                                                                                  | 466.1                                                                                                                    |
| Acute bronchiolitis due to other<br>infectious organisms                                       | 466.19                                                                                                                   |
| Acute bronchitis                                                                               | 466.0                                                                                                                    |
| Acute bronchiolitis                                                                            | 466.1                                                                                                                    |
| Leukemoid reaction                                                                             | 288.62                                                                                                                   |
| Hypoxia or hypoxemia                                                                           | 770.8, 770.88                                                                                                            |

**SUPPLEMENTAL TABLE 5** Categories of CCC and ICD-9 Codes<sup>7</sup>

| CCC categories                     | Subcategories                                   | ICD-9 codes                                                                                                    |
|------------------------------------|-------------------------------------------------|----------------------------------------------------------------------------------------------------------------|
| Prematurity                        | Preterm infants                                 | 765.0, 765.1, 765.21, 765.22, 765.23, 765.24, 765.25, 765.26, 765.27, 765.28                                   |
| Neuromuscular                      | Brain and spinal cord malformations             | 740.0–742.9                                                                                                    |
|                                    | Mental retardation                              | 318.0–318.2                                                                                                    |
|                                    | Central nervous system degeneration and disease | 330.0–330.9, 334.0–334.2, 335.0–335.9                                                                          |
|                                    | Infantile cerebral palsy                        | 343.0–343.9                                                                                                    |
|                                    | Muscular dystrophies and myopathies             | 359.0–359.3                                                                                                    |
| Cardiovascular                     | Heart and great vessel malformations            | 745.0–747.4                                                                                                    |
|                                    | Cardiomyopathies                                | 425.0–425.4, 429.1                                                                                             |
|                                    | Conduction disorders and dysrhythmias           | 426.0–427.4, 427.6–427.9                                                                                       |
| Respiratory                        | Respiratory malformations                       | 748.0–748.9                                                                                                    |
|                                    | Chronic respiratory disease                     | 770.7                                                                                                          |
|                                    | Cystic fibrosis                                 | 277.0                                                                                                          |
|                                    | Asthma                                          | 493.00, 493.01, 493.02, 493.10, 493.11, 493.12, 493.20, 493.21, 493.22, 493.81, 493.82, 493.90, 493.91, 493.92 |
| Renal                              | Congenital anomalies                            | 753.0–753.9                                                                                                    |
|                                    | Chronic renal failure                           | 585                                                                                                            |
| Gastrointestinal                   | Congenital anomalies                            | 750.3, 751.1–751.3, 751.6–751.9                                                                                |
|                                    | Chronic liver disease and cirrhosis             | 571.4–571.9                                                                                                    |
|                                    | Inflammatory bowel disease                      | 555.0–556.9                                                                                                    |
| Hematology and immunodeficiency    | Sickle cell disease                             | 282.5–282.6                                                                                                    |
|                                    | Hereditary anemias                              | 282.0–282.4                                                                                                    |
|                                    | Hereditary immunodeficiency                     | 279.00–279.9, 288.1–288.2, 446.1                                                                               |
|                                    | HIV disease                                     | 0420–0421                                                                                                      |
| Metabolic                          | Amino acid metabolism                           | 270.0–270.9                                                                                                    |
|                                    | Carbohydrate metabolism                         | 271.0–271.9                                                                                                    |
|                                    | Lipid metabolism                                | 272.0–272.9                                                                                                    |
|                                    | Storage disorders                               | 277.3, 277.5                                                                                                   |
|                                    | Other metabolic disorders                       | 275.0–275.3, 277.2, 277.4, 277.6, 277.8, 277.9                                                                 |
|                                    | Other congenital or genetic defect              | 758.0–758.9                                                                                                    |
| Other congenital or genetic defect | Chromosomal anomalies                           | 758.0–758.9                                                                                                    |
|                                    | Bone and joint anomalies                        | 259.4, 737.3, 756.0–756.5                                                                                      |
|                                    | Diaphragm and abdominal wall                    | 553.3, 756.6–756.7                                                                                             |
|                                    | Other congenital anomalies                      | 759.7–759.9                                                                                                    |
| Malignancy                         |                                                 | 140.0–208.9, 235.0–239.9                                                                                       |
